# Supplementary material for: Rapid Microwave‐Annealing Process of Hybrid Perovskites to Eliminate Miscellaneous Phase for High Performance Photovoltaics
Source: PubMed Central journal article supplement (PMC7312440; doi:10.1002/advs.202000480), 2020-04-30
Supplement: ADVS-7-2000480-s001.pdf [file ADVS-7-2000480-s001.pdf]

## Supporting Information

**Rapid Microwave-Annealing Process of Hybrid Perovskites to Eliminate  
Miscellaneous Phase for High Performance Photovoltaics**

Qing Chen<sup>1†</sup>, Taotao Ma<sup>1†</sup>, Fangfang Wang<sup>1†</sup>, You Liu<sup>1</sup>, Sizhou Liu<sup>1</sup>, Jungan Wang<sup>1</sup>, Zhengchun Cheng<sup>1</sup>, Qing Chang<sup>1</sup>, Rong Yang<sup>1</sup>, Wenchao Huang<sup>3</sup>, Lin Wang<sup>1</sup>, Tianshi Qin<sup>1\*</sup>, Wei Huang<sup>2\*</sup>

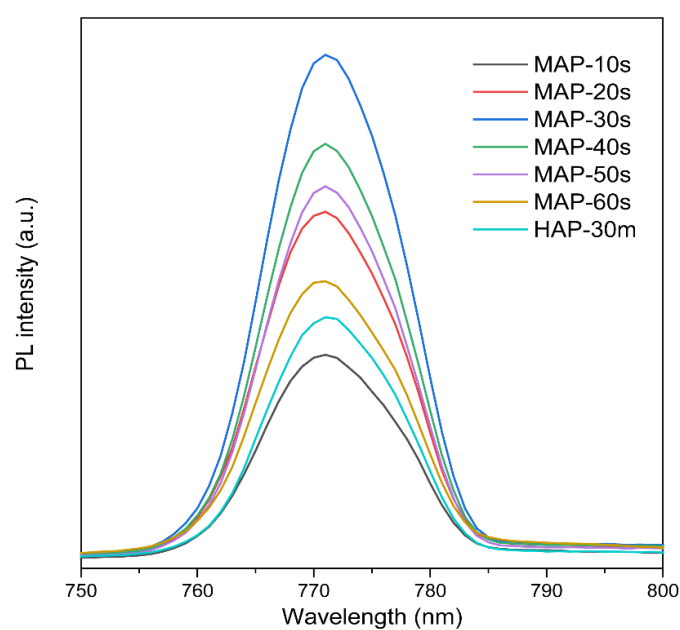

**Figure S1** Steady-state PL spectra of MAP and HAP perovskite films with different annealing periods on quartz substrates.

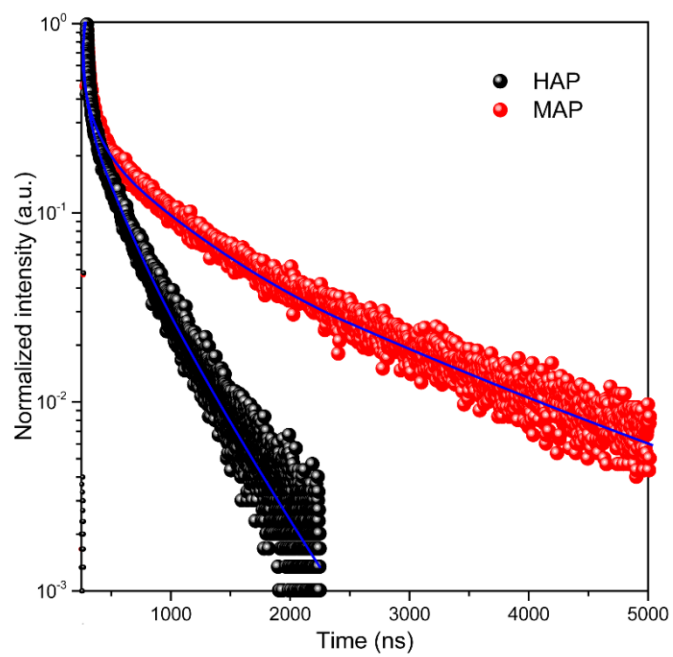

**Figure S2** Time-resolved PL spectra of MAP-30s and HAP-30m perovskite films on quartz substrates.

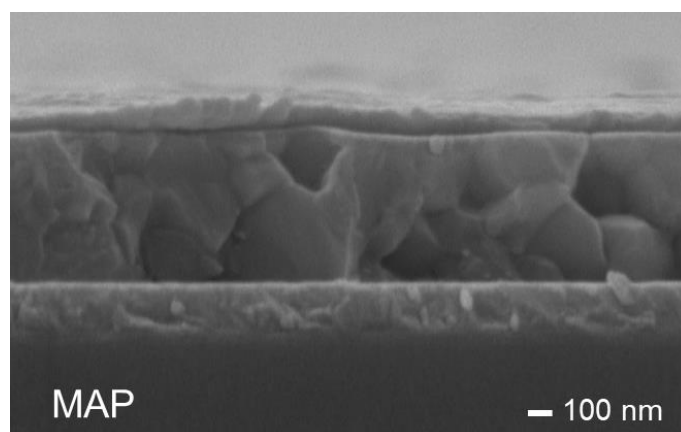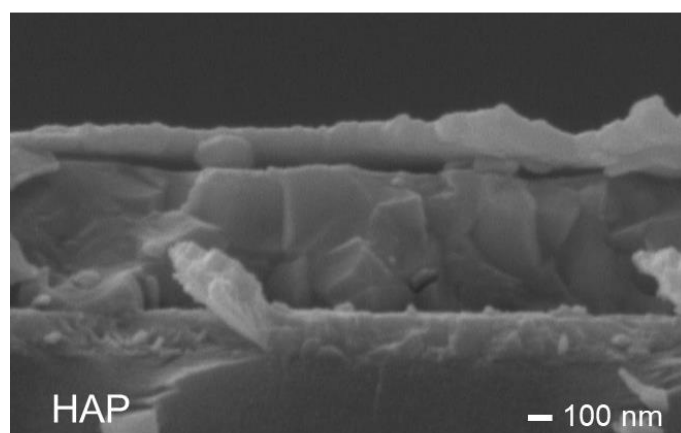

**Figure S3** Cross-sectional SEM images of MAP and HAP devices with ITO/perovskite/Au structures for SCLC measurements.

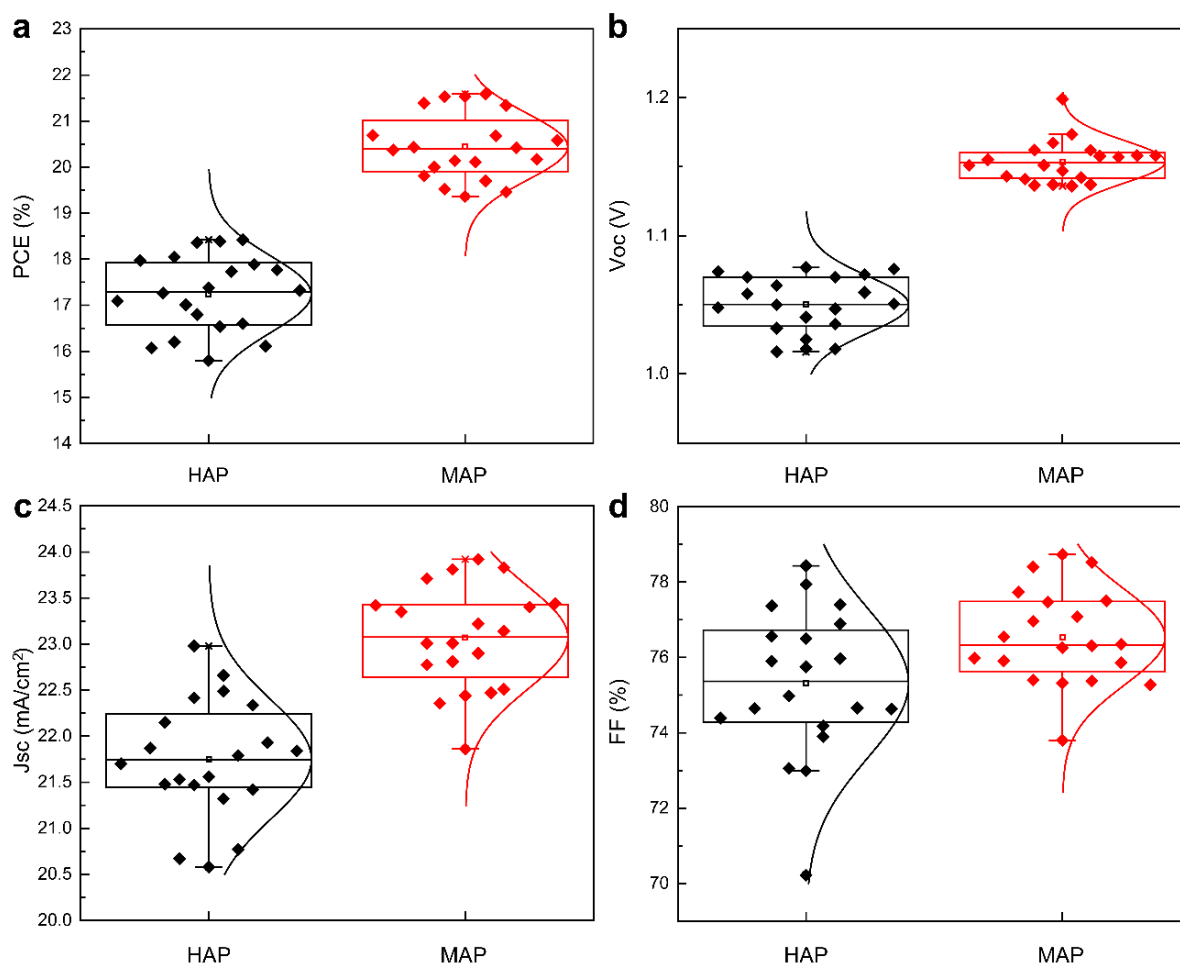

**Figure S4** The distribution curves of  $V_{oc}$ ,  $J_{sc}$ , fill factor ( $FF$ ) and PCEs of 20 independent MAP and HAP PSCs.

**Table S1** Parameters of the time-resolved photoluminescence (TRPL) spectroscopy of perovskite films on quartz substrates processed by HAP and MAP with different periods, respectively.

|         | $\tau_1$ [ns] | $A_1$ [%] | $\tau_2$ [ns] | $A_2$ [%] | $\tau_3$ [ns] | $A_3$ [%] | $\tau_{ave}$ [ns] |
|---------|---------------|-----------|---------------|-----------|---------------|-----------|-------------------|
| HAP-30m | 16.98         | 6.16      | 127.12        | 25.91     | 402.69        | 67.93     | 307.53            |
| MAP-10s | 29.04         | 4.90      | 260.97        | 23.14     | 1169.84       | 71.97     | 903.74            |

|         |        |      |        |       |         |       |         |
|---------|--------|------|--------|-------|---------|-------|---------|
| MAP-20s | 100.00 | 3.30 | 476.48 | 39.23 | 1558.19 | 57.47 | 1085.71 |
| MAP-30s | 139.62 | 5.39 | 667.21 | 40.84 | 2034.43 | 53.78 | 1374.13 |
| MAP-40s | 144.23 | 4.76 | 600.91 | 40.22 | 1871.77 | 55.02 | 1278.39 |
| MAP-50s | 85.35  | 4.84 | 506.44 | 38.47 | 1652.23 | 56.58 | 1133.87 |
| MAP-60s | 34.20  | 8.28 | 367.48 | 39.01 | 1455.67 | 53.71 | 913.46  |

The PL decay time and amplitudes are modeled using a biexponential expression:

$$f(t) = \sum_i A_i \exp\left(-\frac{t}{\tau_i}\right) + K$$

where  $A_i$  is the decay amplitude,  $\tau_i$  is the decay time and  $K$  is a constant for the base-line offset. The average PL decay times ( $\tau_{ave}$ ) are further estimated using the  $\tau_i$  and  $A_i$  values from the fitted curve data **Table S1** using:

$$\tau_{ave} = \frac{\sum A_i \tau_i^2}{\sum A_i \tau_i}$$

**Table S2** Photovoltaic performance of devices fabricated from different processing periods and different microwave output power efficiencies (microwave oven: DAEWOO, KOR-4A6BR, fixed power source type, output efficiencies set on control panel between 20% and MAX by manufacturer's programming on interval spare times). PV parameters were measured from best performing devices under the standard AM 1.5G illumination. <sup>a)</sup> The output power of MAP is 500 W and temperature of HAP is 100°C. <sup>b)</sup> The MAP period is 30 seconds. <sup>c)</sup> The values in the parentheses are the average PCEs from over 20 devices.

| Period <sup>a)</sup> | $V_{oc}$ [V]     | $J_{sc}$ [mA/cm <sup>2</sup> ] | $FF$ [%]           | PCE [%] <sup>c)</sup> |
|----------------------|------------------|--------------------------------|--------------------|-----------------------|
| MAP-10s              | 1.13 (1.12±0.02) | 20.00 (19.59±1.56)             | 73.38 (70.25±3.95) | 16.59 (15.15±1.44)    |
| MAP-20s              | 1.14 (1.14±0.01) | 22.84 (22.06±1.28)             | 76.23 (73.56±3.57) | 19.92 (19.36±0.65)    |

|         |                  |                    |                    |                    |
|---------|------------------|--------------------|--------------------|--------------------|
| MAP-30s | 1.16 (1.15±0.03) | 23.81 (23.06±1.20) | 78.52 (76.54±2.74) | 21.59 (20.44±1.15) |
| MAP-40s | 1.14 (1.13±0.02) | 23.67 (22.65±1.64) | 77.83 (75.34±3.18) | 20.87 (19.87±1.08) |
| MAP-50s | 1.13 (1.12±0.01) | 22.84 (21.86±1.39) | 78.48 (75.85±3.26) | 20.35 (19.58±0.99) |
| MAP-60s | 1.13 (1.12±0.02) | 22.47 (21.52±1.55) | 77.96 (74.98±3.52) | 19.82 (19.22±0.75) |
| HAP-30m | 1.05 (1.03±0.03) | 22.43 (21.23±1.68) | 77.53 (74.58±3.19) | 18.33 (17.24±1.98) |

  

| Output power efficiency <sup>b)</sup> | $V_{oc}$ [V]     | $J_{sc}$ [mA/cm <sup>2</sup> ] | $FF$ [%]           | PCE [%] <sup>c)</sup> |
|---------------------------------------|------------------|--------------------------------|--------------------|-----------------------|
| 20%                                   | 1.15 (1.14±0.02) | 18.30 (17.59±1.46)             | 72.12 (70.13±3.22) | 15.17 (14.25±1.13)    |
| 40%                                   | 1.17 (1.15±0.02) | 18.09 (17.66±1.85)             | 75.26 (73.28±3.29) | 15.92 (15.53±0.57)    |
| 60%                                   | 1.17 (1.15±0.03) | 20.55 (20.05±1.87)             | 75.17 (74.56±3.74) | 18.07 (17.69±0.75)    |
| 80%                                   | 1.17 (1.15±0.02) | 22.69 (21.98±1.56)             | 76.54 (75.66±2.88) | 20.31 (19.45±0.98)    |
| MAX                                   | 1.16 (1.15±0.03) | 23.81 (22.65±1.64)             | 78.52 (76.54±2.74) | 21.59 (20.44±1.15)    |

**Table S3** Fitted values of different electronic parameters from dark Nyquist plots of HAP and MAP devices.

| Device | $R_s$ ( $\Omega\cdot\text{cm}^2$ )<br>(Deviations) | $R_c$ ( $\Omega\cdot\text{cm}^2$ )<br>(Deviations) | $R_{REC}$ ( $\Omega\cdot\text{cm}^2$ )<br>(Deviations) | $C_c$ (nF/cm <sup>2</sup> )<br>(Deviations) | $C_\mu$ (nF/cm <sup>2</sup> )<br>(Deviations) |
|--------|----------------------------------------------------|----------------------------------------------------|--------------------------------------------------------|---------------------------------------------|-----------------------------------------------|
| HAP    | 3.58 (7.67%)                                       | 24.32 (5.81%)                                      | 291.40 (1.14%)                                         | 236.66 (3.63%)                              | 44.00 (1.08%)                                 |
| MAP    | 1.83 (9.37%)                                       | 15.72 (1.71%)                                      | 515.20 (1.93%)                                         | 208.48 (3.07%)                              | 40.91 (2.02%)                                 |

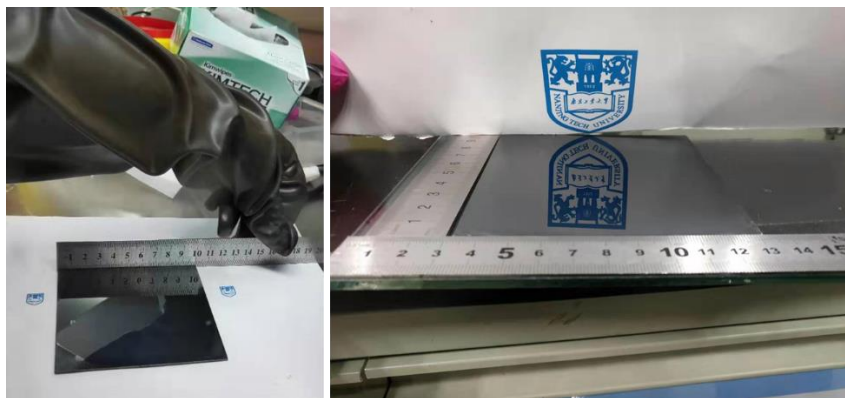

**Figure S5** Photograph of the 10mm ×10mm large-scale perovskite films treated by MAP.

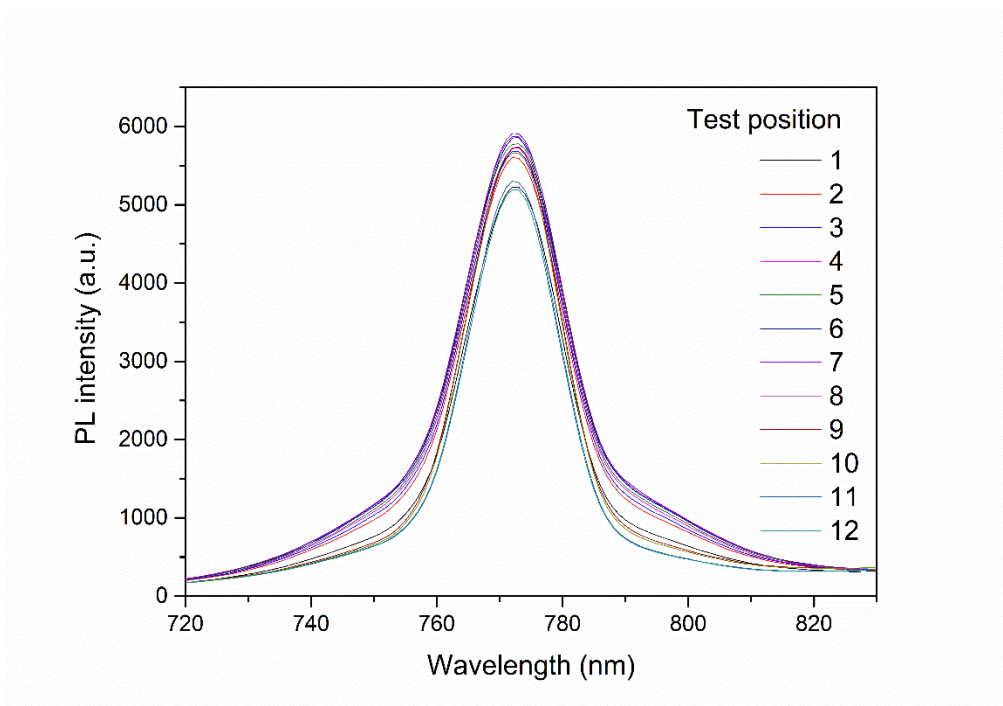

**Figure S6** Steady-state PL spectra of MAP perovskite films measured from twelve different spots of the large area perovskite films on glass substrates.

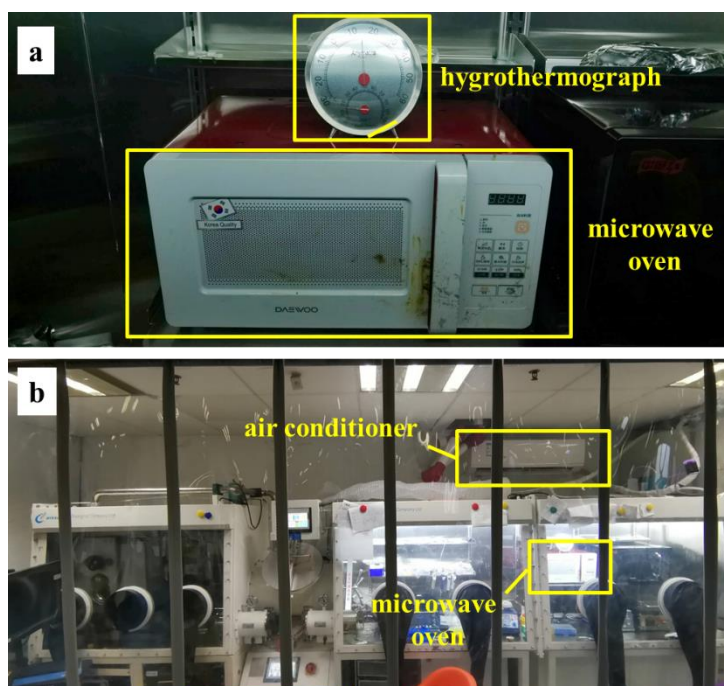

**Figure S7.** a) The microwave oven in the glovebox; b) The inside temperature of the glovebox controlled by air conditioner in an enclosed space.
